# Supplementary material for: Emergence of light-driven protometabolism on recruitment of a photocatalytic cofactor by a self-replicator
Source: Springer Nature journal article supplement (doi:10.1038/s41557-020-0494-4), 2020-06-26
Supplement: 41557_2020_494_MOESM1_ESM.mol [file 41557_2020_494_MOESM1_ESM.mol]

nchem.19051002B-comp1.mol
  ChemDraw05282012132D

 52 53  0  0  1  0  0  0  0  0999 V2000
   -6.4302   -0.6187    0.0000 C   0  0  0  0  0  0  0  0  0  0  0  0
   -6.4302   -1.4437    0.0000 C   0  0  0  0  0  0  0  0  0  0  0  0
   -5.7158   -1.8562    0.0000 C   0  0  0  0  0  0  0  0  0  0  0  0
   -5.0013   -1.4437    0.0000 C   0  0  0  0  0  0  0  0  0  0  0  0
   -5.0013   -0.6187    0.0000 C   0  0  0  0  0  0  0  0  0  0  0  0
   -5.7158   -0.2062    0.0000 C   0  0  0  0  0  0  0  0  0  0  0  0
   -7.1447   -0.2062    0.0000 S   0  0  0  0  0  0  0  0  0  0  0  0
   -5.7158   -2.6812    0.0000 S   0  0  0  0  0  0  0  0  0  0  0  0
   -4.2868   -0.2062    0.0000 C   0  0  0  0  0  0  0  0  0  0  0  0
   -3.5724   -0.6187    0.0000 N   0  0  0  0  0  0  0  0  0  0  0  0
   -2.8579   -0.2062    0.0000 C   0  0  0  0  0  0  0  0  0  0  0  0
   -2.1434   -0.6187    0.0000 C   0  0  0  0  0  0  0  0  0  0  0  0
   -1.4289   -0.2062    0.0000 N   0  0  0  0  0  0  0  0  0  0  0  0
   -0.7145   -0.6187    0.0000 C   0  0  0  0  0  0  0  0  0  0  0  0
    0.0000   -0.2062    0.0000 C   0  0  0  0  0  0  0  0  0  0  0  0
    0.7145   -0.6187    0.0000 N   0  0  0  0  0  0  0  0  0  0  0  0
    1.4289   -0.2062    0.0000 C   0  0  0  0  0  0  0  0  0  0  0  0
    2.1434   -0.6187    0.0000 C   0  0  0  0  0  0  0  0  0  0  0  0
    2.8579   -0.2062    0.0000 N   0  0  0  0  0  0  0  0  0  0  0  0
    3.5724   -0.6187    0.0000 C   0  0  0  0  0  0  0  0  0  0  0  0
   -4.2868    0.6187    0.0000 O   0  0  0  0  0  0  0  0  0  0  0  0
   -2.1434   -1.4437    0.0000 O   0  0  0  0  0  0  0  0  0  0  0  0
    0.0000    0.6187    0.0000 O   0  0  0  0  0  0  0  0  0  0  0  0
   -0.7145   -1.4437    0.0000 C   0  0  0  0  0  0  0  0  0  0  0  0
    0.0000   -1.8562    0.0000 C   0  0  0  0  0  0  0  0  0  0  0  0
    0.7145   -1.4437    0.0000 C   0  0  0  0  0  0  0  0  0  0  0  0
    0.0000   -2.6812    0.0000 C   0  0  0  0  0  0  0  0  0  0  0  0
    1.4289    0.6187    0.0000 C   0  0  0  0  0  0  0  0  0  0  0  0
    2.1434    1.0313    0.0000 C   0  0  0  0  0  0  0  0  0  0  0  0
    2.1434    1.8562    0.0000 C   0  0  0  0  0  0  0  0  0  0  0  0
    2.8579    2.2687    0.0000 C   0  0  0  0  0  0  0  0  0  0  0  0
    2.8579    3.0938    0.0000 N   0  3  0  0  0  0  0  0  0  0  0  0
    2.1434   -1.4437    0.0000 O   0  0  0  0  0  0  0  0  0  0  0  0
    4.2868   -0.2062    0.0000 C   0  0  0  0  0  0  0  0  0  0  0  0
    4.2868    0.6187    0.0000 O   0  0  0  0  0  0  0  0  0  0  0  0
    5.0013   -0.6187    0.0000 N   0  0  0  0  0  0  0  0  0  0  0  0
    5.7158   -0.2062    0.0000 C   0  0  0  0  0  0  0  0  0  0  0  0
    6.4302   -0.6187    0.0000 C   0  0  0  0  0  0  0  0  0  0  0  0
    7.1447   -0.2062    0.0000 O   0  5  0  0  0  0  0  0  0  0  0  0
    6.4302   -1.4437    0.0000 O   0  0  0  0  0  0  0  0  0  0  0  0
    3.5724   -1.4437    0.0000 C   0  0  0  0  0  0  0  0  0  0  0  0
    4.2868   -1.8562    0.0000 C   0  0  0  0  0  0  0  0  0  0  0  0
    4.2868   -2.6812    0.0000 C   0  0  0  0  0  0  0  0  0  0  0  0
    5.0013   -3.0938    0.0000 C   0  0  0  0  0  0  0  0  0  0  0  0
    5.7158   -2.6812    0.0000 C   0  0  0  0  0  0  0  0  0  0  0  0
    5.7158   -1.8562    0.0000 C   0  0  0  0  0  0  0  0  0  0  0  0
    5.0013   -1.4437    0.0000 C   0  0  0  0  0  0  0  0  0  0  0  0
    5.7158    0.6187    0.0000 C   0  0  0  0  0  0  0  0  0  0  0  0
    6.4302    1.0313    0.0000 C   0  0  0  0  0  0  0  0  0  0  0  0
    6.4302    1.8562    0.0000 C   0  0  0  0  0  0  0  0  0  0  0  0
    7.1447    2.2687    0.0000 C   0  0  0  0  0  0  0  0  0  0  0  0
    7.1447    3.0938    0.0000 N   0  3  0  0  0  0  0  0  0  0  0  0
  1  2  2  0      
  2  3  1  0      
  3  4  2  0      
  4  5  1  0      
  5  6  2  0      
  6  1  1  0      
  1  7  1  0      
  3  8  1  0      
  5  9  1  0      
  9 10  1  0      
 10 11  1  0      
 11 12  1  0      
 12 13  1  0      
 13 14  1  0      
 14 15  1  0      
 15 16  1  0      
 16 17  1  0      
 17 18  1  0      
 18 19  1  0      
 19 20  1  0      
  9 21  2  0      
 12 22  2  0      
 15 23  2  0      
 14 24  1  6      
 24 25  1  0      
 25 26  1  0      
 25 27  1  0      
 17 28  1  1      
 28 29  1  0      
 29 30  1  0      
 30 31  1  0      
 31 32  1  0      
 18 33  2  0      
 20 34  1  0      
 34 35  2  0      
 34 36  1  0      
 36 37  1  0      
 37 38  1  0      
 38 39  1  0      
 38 40  2  0      
 20 41  1  6      
 41 42  1  0      
 42 43  2  0      
 43 44  1  0      
 44 45  2  0      
 45 46  1  0      
 46 47  2  0      
 47 42  1  0      
 37 48  1  1      
 48 49  1  0      
 49 50  1  0      
 50 51  1  0      
 51 52  1  0      
M  CHG  3  32   1  39  -1  52   1
M  END
